# Supplementary material
Source: publisher site journal article supplement (https://www.dovepress.com/article/467516)
Supplement: Supplementary file 1 [file get_supplementary_file.php]

Table S1: Baseline Characteristics of Study Participants in NHANES 2015-2020 Subgrouped According to Presence or Absence of Snoring

|  | non-snoring | snoring | | | P-value | |
| --- | --- | --- | --- | --- | --- | --- |
| Total No. of participants | 4023 | | 8658 | |  | |
| Creatinine(mmol/L) | 73.816 (73.063 74.576) | | 75.470 (74.993 75.949) | | <0.001 | |
| Sodium(mmol/L) | 139.657 (139.572 139.742) | | 139.790 (139.733 139.847) | | 0.01 | |
| triglyceride(mmol/L) | 1.250 (1.227 1.273) | | 1.427 (1.409 1.445) | | <0.001 | |
| Uric acid(mmol/L) | 296.933 (294.250 299.640) | | 316.352 (314.512 318.202) | | <0.001 | |
| total cholesterol(mmol/L) | 4.663 (4.630 4.696) | | 4.768 (4.745 4.791) | | <0.001 | |
| high-density lipoprotein cholesterol(mmol/L) | 1.395 (1.381 1.408) | | 1.300 (1.292 1.308) | | <0.001 | |
| low-density lipoprotein cholesterol(mmol/L) | 2.609 (2.567 2.652) | | 2.739 (2.710 2.768) | | <0.001 | |
| Gender |  | |  | | <0.001 |
| female | 2341 (58.190%) | | 4131 (47.713%) | |  |
| male | 1682 (41.810%) | | 4527 (52.287%) | |  |
| Age |  | |  | | <0.001 |
| 18–44 yr | 1783 (44.320%) | | | 3498 (40.402%) |  |
| 45–64 yr | 1153 (28.660%) | | | 3350 (38.693%) |  |
| ≥65 yr | 1087 (27.020%) | | | 1810 (20.906%) |  |
| Race |  | | |  | <0.001 |
| Mexican American | 463 (11.509%) | | | 1262 (14.576%) |  |
| Other Hispanic | 428 (10.639%) | | | 1023 (11.816%) |  |
| non-Hispanic White | 1464 (36.391%) | | | 2911 (33.622%) |  |
| non-Hispanic Black | 1021 (25.379%) | | | 2090 (24.140%) |  |
| Non-Hispanic Asian | 490 (12.180%) | | | 971 (11.215%) |  |
| other | 157 (3.903%) | | | 401 (4.632%) |  |
| EDUCATION |  | | |  | <0.001 |
| less than 11th grade | 860 (21.377%) | | | 1673 (19.323%) |  |
| high school | 945 (23.490%) | | | 2013 (23.250%) |  |
| some college | 1254 (31.171%) | | | 2772 (32.017%) |  |
| college graduate | 950 (23.614%) | | | 2194 (25.341%) |  |
| other | 14 (0.348%) | | | 6 (0.069%) |  |
| Marital status |  | | |  | <0.001 |
| Never married | 1736 (43.152%) | | | 5254 (60.684%) |  |
| Married or living with partner | 830 (20.631%) | | | 1251 (14.449%) |  |
| Divorced, separated, or widowed | 810 (20.134%) | | | 1202 (13.883%) |  |
| Other | 647 (16.083%) | | | 951 (10.984%) |  |
| Ratio of family income to poverty level |  | | |  | <0.001 |
| ≤1.3 of thefederal poverty line | 1216 (30.226%) | | | 2126 (24.555%) |  |
| >1.3≤3.49 of the federal poverty line | 1352 (33.607%) | | | 3049 (35.216%) |  |
| >3.5 of the federal poverty line | 911 (22.645%) | | | 2526 (29.175%) |  |
| other | 544 (13.522%) | | | 957 (11.053%) |  |
|  |  | | |  | <0.001 |
| 0 | 2990 (74.323%) | | | 6102 (70.478%) |  |
| Diabetes | 1033 (25.677%) | | | 2556 (29.522%) |  |
| BMI (kg/m2) |  | | |  | <0.001 |
| <25 | 1499 (37.261%) | | | 1865 (21.541%) |  |
| 25 to 30 | 1228 (30.524%) | | | 2765 (31.936%) |  |
| 30 | 1247 (30.997%) | | | 3958 (45.715%) |  |
| other | 49 (1.218%) | | | 70 (0.809%) |  |
| Cigarette use |  | | |  | 0.032 |
| never smoked | 2397 (59.582%) | | | 4937 (57.022%) |  |
| former smoker | 232 (5.767%) | | | 498 (5.752%) |  |
| current smoker | 436 (10.838%) | | | 969 (11.192%) |  |
| other | 958 (23.813%) | | | 2254 (26.034%) |  |
| Alcohol use |  | | |  | <0.001 |
| never drinker | 1594 (39.622%) | | | 2797 (32.305%) |  |
| low-to-moderate drinker | 1237 (30.748%) | | | 2974 (34.350%) |  |
| heavy drinker | 1192 (29.630%) | | | 2887 (33.345%) |  |

Table S2 Baseline Characteristics of Snoring Patients Stratified by Sex

|  | male | female | P-value |
| --- | --- | --- | --- |
| Total No. of participants | 4527 | 4131 |  |
| Age | 47.300 (46.798 to 47.808) | 47.419 (46.898 to 47.945) | 0.75 |
| Creatinine(mmol/L) | 86.268 (85.637 to 86.904) | 65.238 (64.690 to 65.791) | <0.001 |
| sodium(mmol/L) | 139.878 (139.799 to 139.958) | 139.695 (139.613 to 139.776) | 0.002 |
| triglyceride(mmol/L) | 1.524 (1.495 to 1.553) | 1.329 (1.306 to 1.351) | <0.001 |
| Uric acid(mmol/L) | 351.951 (349 to 562 354.356) | 281.637 (279.325 to 283.969) | <0.001 |
| high-density lipoprotein cholesterol(mmol/L) | 1.196 (1.186 to 1.206) | 1.423 (1.411 to 1.436) | <0.001 |
| low-density lipoprotein cholesterol(mmol/L) | 2.739 (2.698 to 2.781) | 2.739 (2.698 to 2.779) | 0.984 |
| BMI (kg/m2) | 29.293 (29.120 to 29.466) | 30.518 (30.289 to 30.749) | <0.001 |
| <25 | 968 (21.383%) | 897 (21.714%) |  |
| 25 to 30 | 1638 (36.183%) | 1127 (27.282%) |  |
| 30< | 1876 (41.440%) | 2082 (50.399%) |  |
| other | 45 (0.994%) | 25 (0.605%) |  |
| Race |  |  | 0.016 |
| Mexican American | 643 (14.204%) | 619 (14.984%) |  |
| Other Hispanic | 512 (11.310%) | 511 (12.370%) |  |
| non-Hispanic White | 1574 (34.769%) | 1337 (32.365%) |  |
| non-Hispanic Black | 1048 (23.150%) | 1042 (25.224%) |  |
| Non-Hispanic Asian | 526 (11.619%) | 445 (10.772%) |  |
| other | 224 (4.948%) | 177 (4.285%) |  |
| Education |  |  | <0.001 |
| less than 11th grade | 927 (20.477%) | 746 (18.059%) |  |
| high school | 1098 (24.254%) | 915 (22.150%) |  |
| some college | 1345 (29.711%) | 1427 (34.544%) |  |
| college graduate | 1153 (25.469%) | 1041 (25.200%) |  |
| other | 4 (0.088%) | 2 (0.048%) |  |
| Marital status |  |  | <0.001 |
| Never married | 3048 (67.329%) | 2206 (53.401%) |  |
| Married or living with partner | 437 (9.653%) | 814 (19.705%) |  |
| Divorced, separated, or widowed | 558 (12.326%) | 644 (15.589%) |  |
| Other | 484 (10.691%) | 467 (11.305%) |  |
| Ratio of family income to poverty level |  |  | <0.001 |
| ≤1.3 of the federal poverty line | 1014 (22.399%) | 1112 (26.918%) |  |
| >1.3≤3.49 of the federal poverty line | 1605 (35.454%) | 1444 (34.955%) |  |
| >3.5 of the federal poverty line | 1399 (30.903%) | 1127 (27.282%) |  |
| other | 509 (11.244%) | 448 (10.845%) |  |

Table S3 Snoring and Indicators of Cardiovascular Disease Risk Grouped According to the Severity of snoring

|  | Model 1 | | |  | Model 2 | | |  | Model 3 | | |
| --- | --- | --- | --- | --- | --- | --- | --- | --- | --- | --- | --- |
|  | std. err. | z | OR (95%CI) P |  | std. err. | z | OR (95%CI) P |  | std. err. | z | OR (95%CI) P |
| Non-snoring |  |  | reference |  |  |  | reference |  |  |  | reference |
| Snoring | 0.08 | 6.138 | 1.415(1.266 to 1.581) <0.001 |  | 0.085 | 5.459 | 1.394(1.237 to 1.571) <0.001 |  | 0.136 | 3.791 | 1.432(1.189 to 1.725) <0.001 |

Model 1: unadjusted.

Model 2: adjusted for sex, race, age, education, marital.

Model 3: adjusted for sex, race, age, education, marital, creatinine, triglyceride, uric acid, total cholesterol, high-density lipoprotein cholesterol, low-density lipoprotein cholesterol.

std. err：Standard error
